# Supplementary material for: A Systematic Review of Apps using Mobile Criteria for Adolescent Pregnancy Prevention (mCAPP)
Source: PubMed Central journal article supplement (PMC5122721; doi:10.2196/mhealth.6611), 2016-11-10
Supplement: mhealth_v4i4e122_app1.pdf [file mhealth_v4i4e122_app1.pdf]

**FOR EVALUATORS**

**General App Information**

Name of app \_\_\_\_\_  
 Name of app developer \_\_\_\_\_  
 App store \_\_\_\_\_  
 Current version \_\_\_\_\_  
 Current version average stars/rating \_\_\_\_\_  
 Current version number of reviews \_\_\_\_\_  
 App store category \_\_\_\_\_  
 Date last updated \_\_\_\_\_  
 Number of installs (only available in Google Play) \_\_\_\_\_  
 Age rating \_\_\_\_\_  
 Sponsoring organization (if different from app developer) \_\_\_\_\_

|                                                               |                                                                                                                           |                                                                  |                                                                              |
|---------------------------------------------------------------|---------------------------------------------------------------------------------------------------------------------------|------------------------------------------------------------------|------------------------------------------------------------------------------|
| Target gender                                                 | <input type="checkbox"/> Male                                                                                             | <input type="checkbox"/> Female                                  | <input type="checkbox"/> Both                                                |
| Perceived race/ethnicity in images<br>(choose all that apply) | <input type="checkbox"/> None (no images)<br><input type="checkbox"/> Hispanic/Latino<br><input type="checkbox"/> Unclear | <input type="checkbox"/> White<br><input type="checkbox"/> Asian | <input type="checkbox"/> Black<br><input type="checkbox"/> Native American   |
| Religious affiliation                                         | <input type="checkbox"/> Yes <input type="checkbox"/> No<br>If yes, name religion: _____                                  |                                                                  |                                                                              |
| Geographic affiliation                                        | <input type="checkbox"/> Domestic (U.S.)                                                                                  | <input type="checkbox"/> International                           | <input type="checkbox"/> None<br>List cities/countries, if applicable: _____ |
| Source credibility                                            | <input type="checkbox"/> Credible                                                                                         | <input type="checkbox"/> Not credible/unclear                    |                                                                              |
| Abortion stance/tone                                          | <input type="checkbox"/> Pro-choice                                                                                       | <input type="checkbox"/> Pro-life                                | <input type="checkbox"/> Unclear/neutral                                     |
| App purpose<br>(choose all that apply)                        | <input type="checkbox"/> Education                                                                                        | <input type="checkbox"/> Linkage to care                         | <input type="checkbox"/> Counseling/support                                  |

Summary of app purpose: \_\_\_\_\_

**FOR DEVELOPERS & EVALUATORS**

**User Interface – Desirable Features**

- |                                                                     |                                                |
|---------------------------------------------------------------------|------------------------------------------------|
| <input type="checkbox"/> GPS                                        | <input type="checkbox"/> Push notifications    |
| <input type="checkbox"/> Info on clinics/services nearby            | <input type="checkbox"/> Search function       |
| <input type="checkbox"/> Info on where to get contraceptives nearby | <input type="checkbox"/> Gamification elements |
| <input type="checkbox"/> Appointment scheduling                     | <input type="checkbox"/> Direct manipulation   |
| <input type="checkbox"/> Customizable look or feel                  | <input type="checkbox"/> Quizzes               |
| <input type="checkbox"/> Public communication (e.g. forums)         | <input type="checkbox"/> Videos/films          |
| <input type="checkbox"/> Direct communication (chat/messaging)      | <input type="checkbox"/> Decision aids         |

**User Interface – Undesirable Features**

- Faulty element
- App crashes
- Purchase requirement
- Advertisement(s)

Notable interface features: \_\_\_\_\_

FOR DEVELOPERS & EVALUATORS

**Teen Pregnancy Prevention Best Practices**

- Persuasive language about abstinence (e.g. “teens *should*...”, “most students do...”)
- Persuasive language about contraception (e.g. “teens *should*...”, “most students do...”)
- Theoretical approach (i.e. theory is explicitly cited in app or app description)
- Accurate information about pregnancy risk of sexual activities
- Accurate information on how to use contraceptives
- Examples of or practice with sexual communication, negotiation, or refusal skills
- Activities designed to involve users and have them personalize the information
- Targeting for specific race/ethnic group

**Teen Pregnancy Prevention Promising Practices**

- Information on parental consent (e.g. “Parental consent is not required to obtain birth control in California”)
- Encouragement of parental communication
- Peer connection (peer stories or peer counseling)

**Sexual and Reproductive Features and Content**

- Information on the cost of sexual and reproductive health (SRH) services
- Information about confidentiality and/or privacy of app and SRH services
- Professional medical advice disclaimer (e.g. “App is not a replacement for professional medical advice”)
- Information or counseling on abusive relationships or violence
- Information or counseling on alcohol or substance abuse
- Information or counseling on pregnancy testing/referral
- Information or counseling on abortion options & services

**Contraceptive Information:**

|                                                                                                                                  |                                                                                                                                  |
|----------------------------------------------------------------------------------------------------------------------------------|----------------------------------------------------------------------------------------------------------------------------------|
| <input type="checkbox"/> Male condoms<br><input type="checkbox"/> How to use <input type="checkbox"/> Effectiveness              | <input type="checkbox"/> Oral pills<br><input type="checkbox"/> How to use <input type="checkbox"/> Effectiveness                |
| <input type="checkbox"/> Injection (Depo)<br><input type="checkbox"/> How to get/duration <input type="checkbox"/> Effectiveness | <input type="checkbox"/> Implant<br><input type="checkbox"/> How to get/duration <input type="checkbox"/> Effectiveness          |
| <input type="checkbox"/> IUD<br><input type="checkbox"/> How to get/duration <input type="checkbox"/> Effectiveness              | <input type="checkbox"/> Emergency contraception<br><input type="checkbox"/> How to use <input type="checkbox"/> EC not abortion |
| <input type="checkbox"/> Withdrawal<br><input type="checkbox"/> When to withdraw <input type="checkbox"/> Effectiveness          |                                                                                                                                  |

- Information on other contraceptive methods
- Information on where to get contraceptives
- Information on side effects of contraceptives
- Information or counseling on side effect management
- Information or counseling on switching method of contraceptives
- Information on dual protection of condoms (against pregnancy and STIs)
- Information on sexually transmitted infections (STIs)
- Information on STI testing

Notable information/bad practices: \_\_\_\_\_
