# Supplementary material for: A Systematic Review of Apps using Mobile Criteria for Adolescent Pregnancy Prevention (mCAPP)
Source: PubMed Central journal article supplement (PMC5122721; doi:10.2196/mhealth.6611), 2016-11-10
Supplement: mhealth_v4i4e122_app2.pdf [file mhealth_v4i4e122_app2.pdf]

**SUPPLEMENTAL MATERIAL A. Overview of Apps Included in Review**

| <b>App Store Availability</b> | <b>App Name</b>                      | <b>Developer/Sponsor</b>                                         | <b>Category</b>  | <b>Geographic Location Specified by App</b>                                  | <b>Last Updated</b> | <b>Installs</b> |
|-------------------------------|--------------------------------------|------------------------------------------------------------------|------------------|------------------------------------------------------------------------------|---------------------|-----------------|
| iTunes                        | my choice by PPT                     | Planned Parenthood Toronto                                       | Education        | Toronto, Canada                                                              | 1/20/2015           | N/A             |
| iTunes                        | SexPositive                          | University of Oregon                                             | Education        | University of Colorado Boulder, University of Maryland, University of Oregon | 9/4/2014            | N/A             |
| iTunes                        | NeedTayKnow                          | John-Paul Thain/ National Health Service Tayside                 | Education        | Tayside, UK                                                                  | 5/14/2015           | N/A             |
| iTunes                        | Safe Sex Tips                        | Dharmendra Solanki                                               | Entertainment    |                                                                              | 1/26/2015           | N/A             |
| iTunes                        | Your Choice Your Voice               | Thomas Benjamin Ltd/ Bromley Healthcare, National Health Service | Health & Fitness | London, UK                                                                   | 10/9/2014           | N/A             |
| iTunes                        | SafeSex101                           | Associated Students UCLA                                         | Lifestyle        | Los Angeles, California, United States                                       | 2/23/2013           | N/A             |
| iTunes                        | The Choice - it's kind of a big deal | Project Your Choice LLC                                          | Lifestyle        |                                                                              | 8/22/2013           | N/A             |
| iTunes                        | aSk UK                               | John-Paul Thain/ National Health Service Tayside                 | Medical          | Tayside, UK                                                                  | 2/24/2015           | N/A             |
| iTunes                        | Get S.M.A.R.T.                       | William Chavez/ Eight high school students                       | Reference        | California                                                                   | 3/19/2015           | N/A             |
| GP                            | The Real Deal                        | Youth and Family Education Resources (YFER)/ Core of Life        | Education        |                                                                              | 10/13/2013          | 100-500         |
| GP                            | ICAH                                 | ICAH                                                             | Education        | Illinois, USA                                                                | 11/6/2014           | 10-50           |

|      |                            |                                                                                                                                                                                               |                  |                          |            |            |
|------|----------------------------|-----------------------------------------------------------------------------------------------------------------------------------------------------------------------------------------------|------------------|--------------------------|------------|------------|
| GP   | ASK My Body App            | Grappetite/ Youth Empowerment Alliance                                                                                                                                                        | Health & Fitness | Pakistan                 | 8/10/2015  | 50-100     |
| GP   | Girls Incorporated of Lynn | The Middle School Pregnancy Prevention Program, and Teen Health Ambassador Program at Girls Incorporated of Lynn with funding from the MDPH Office of Adolescent Health and Youth Development | Health & Fitness | Lynn, Massachusetts, USA | 10/21/2013 | 100-500    |
| GP   | OC Teens Mobile            | AmongTheNationsMD/ CATCH, American Academy of Pediatrics                                                                                                                                      | Health & Fitness | Orange County, CA        | 7/20/2013  | 100-500    |
| GP   | CaSH 2 U                   | ICE/National Health Service Wirral                                                                                                                                                            | Health & Fitness | UK                       | 7/10/2013  | 100-500    |
| GP   | HealthWise                 | Noble Microsystems                                                                                                                                                                            | Health & Fitness | Africa                   | 10/2/2014  | 100-500    |
| GP   | Kent C Card                | Kent Community Health NHS Trust                                                                                                                                                               | Health & Fitness | Kent, UK                 | 9/11/2013  | 500-1000   |
| GP   | Love Matters               | Kwetu Design/ Love Matters                                                                                                                                                                    | Lifestyle        | Kenya                    | 3/19/2015  | 100-500    |
| Both | gPower                     | Georgia Campaign for Adolescent Power & Potential                                                                                                                                             | Health & Fitness | Georgia, USA             | 5/12/2015  | 1000-5000  |
| Both | My Sex Doctor              | MYSD LTD (National Health Service approved)                                                                                                                                                   | Lifestyle        | UK                       | 7/23/2015  | 5000-10000 |
| Both | My Sex Doctor Lite         | MYSD LTD (National Health Service approved)                                                                                                                                                   | Lifestyle        | UK                       | 7/23/2015  | 5000-10000 |
| Both | Teens in NYC               | NY Department of Health and Mental Hygiene                                                                                                                                                    | Lifestyle        | New York City, USA       | 12/15/2014 | 5000-10000 |
